# Supplementary material for: Seroprevalence and Associated Risk Factors of Rift Valley Fever in Livestock from Three Ecological Zones of Malawi
Source: MDPI journal article supplement (doi:10.3390/pathogens11111349), 2022-11-14
Supplement: s1 [file s1]

## Supplementary Material

Contains:

1. Table S1: Optical Density Wavelength Readings for the RVFV IgG Antibodies
2. Table S2: Optical density wavelength readings for the RVFV IgM Antibodies
3. Table S3: Distribution of serum samples across the ecological zones and antibody seropositive results at individual livestock level
4. Table S4: Distribution of serum samples across the ecological zones and districts and antibody seropositive results at herd level

# OPTICAL DENSITY READINGS FOR THE SERUM SAMPLES (IgG and IgM Tests)

**Table S1.** Optical Density Wavelength Readings for the RVFV IgG Antibodies.

| No. | Sample ID | O.D Reading | S/N % | No. | Sample ID | O.D Reading | S/N % |
|-----|-----------|-------------|-------|-----|-----------|-------------|-------|
| 1   | 6         | 0.596       | 31    | 24  | 136       | 0.701       | 38    |
| 2   | 19        | 0.057       | 5     | 25  | 137       | 0.047       | 8     |
| 3   | 26        | 0.194       | 16    | 26  | 138       | 0.106       | 8     |
| 4   | 27        | 0.739       | 39    | 27  | 157       | 0.391       | 31    |
| 5   | 29        | 0.696       | 37    | 28  | 170       | 0.121       | 10    |
| 6   | 47        | 0.296       | 24    | 29  | 195       | 0.096       | 8     |
| 7   | 52        | 0.693       | 36    | 30  | 124       | 0.357       | 29    |
| 8   | 54        | 0.681       | 36    | 31  | 142       | 0.136       | 7     |
| 9   | 55        | 0.06        | 15    | 32  | 143       | 0.348       | 28    |
| 10  | 56        | 0.72        | 38    | 33  | 162       | 0.625       | 33    |
| 11  | 68        | 0.573       | 30    | 34  | 165       | 0.233       | 15    |
| 12  | 70        | 0.259       | 21    | 35  | 175       | 0.388       | 31    |
| 13  | 71        | 0.262       | 14    | 36  | 176       | 0.793       | 33    |
| 14  | 83        | 0.471       | 28    | 37  | 217       | 0.108       | 4     |
| 15  | 102       | 0.107       | 9     | 38  | 218       | 0.11        | 4     |
| 16  | 103       | 0.709       | 37    | 39  | 219       | 0.693       | 28    |
| 17  | 105       | 0.394       | 32    | 40  | 235       | 0.127       | 5     |
| 18  | 106       | 0.063       | 5     | 41  | 269       | 0.085       | 3     |
| 19  | 108       | 0.064       | 5     | 42  | 270       | 0.526       | 21    |
| 20  | 115       | 0.465       | 28    | 43  | 283       | 0.879       | 35    |
| 21  | 119       | 0.487       | 26    | 44  | 302       | 0.981       | 39    |
| 22  | 125       | 0.722       | 39    | 45  | 310       | 0.174       | 7     |
| 23  | 128       | 0.485       | 25    | 46  | 382       | 0.126       | 5     |
| 47  | 387       | 0.297       | 12    | 70  | 535       | 0.173       | 9     |
| 48  | 395       | 0.592       | 23    | 71  | 536       | 0.126       | 7     |
| 49  | 424       | 0.116       | 5     | 72  | 537       | 0.199       | 11    |
| 50  | 425       | 0.142       | 6     | 73  | 538       | 0.087       | 5     |
| 51  | 426       | 0.687       | 27    | 74  | 539       | 0.454       | 25    |
| 52  | 436       | 1.01        | 40    | 75  | 540       | 0.098       | 5     |
| 53  | 437       | 0.876       | 35    | 76  | 547       | 0.541       | 30    |
| 54  | 866       | 0.36        | 14    | 77  | 552       | 0.393       | 21    |
| 55  | 489       | 0.101       | 6     | 78  | 553       | 0.218       | 12    |
| 56  | 490       | 0.085       | 5     | 79  | 566       | 0.071       | 4     |
| 57  | 492       | 0.514       | 28    | 80  | 571       | 0.077       | 4     |
| 58  | 503       | 0.1         | 5     | 81  | 572       | 0.166       | 9     |
| 59  | 508       | 0.195       | 11    | 82  | 573       | 0.063       | 3     |
| 60  | 513       | 0.513       | 28    | 83  | 574       | 0.279       | 15    |
| 61  | 516       | 0.517       | 28    | 84  | 575       | 0.451       | 25    |
| 62  | 520       | 0.274       | 15    | 85  | 576       | 0.733       | 40    |
| 63  | 522       | 0.121       | 7     | 86  | 577       | 0.352       | 19    |
| 64  | 526       | 0.136       | 7     | 87  | 586       | 0.34        | 19    |
| 65  | 527       | 0.147       | 9     | 88  | 590       | 0.252       | 14    |
| 66  | 528       | 0.157       | 9     | 89  | 591       | 0.136       | 7     |
| 67  | 530       | 0.303       | 17    | 90  | 593       | 0.183       | 10    |
| 68  | 532       | 0.09        | 5     | 91  | 596       | 0.066       | 5     |
| 69  | 533       | 0.126       | 7     | 92  | 598       | 0.19        | 15    |
| 93  | 621       | 0.42        | 34    | 118 | 940       | 0.07        | 4     |
| 94  | 657       | 0.059       | 5     | 119 | 941       | 0.143       | 9     |
| 95  | 658       | 0.352       | 28    | 120 | 952       | 0.388       | 25    |
| 96  | 664       | 0.322       | 25    | 121 | 958       | 0.077       | 5     |
| 97  | 665       | 0.056       | 5     | 122 | 961       | 0.529       | 33    |
| 98  | 666       | 0.09        | 7     | 123 | 963       | 0.457       | 29    |
| 99  | 667       | 0.281       | 23    | 124 | 966       | 0.093       | 6     |
| 100 | 668       | 0.057       | 5     | 125 | 968       | 0.632       | 40    |

|     |      |       |      |     |      |       |      |
|-----|------|-------|------|-----|------|-------|------|
| 101 | 669  | 0.38  | 31   | 126 | 969  | 0.083 | 5    |
| 102 | 678  | 0.308 | 25   | 127 | 973  | 0.288 | 18   |
| 103 | 679  | 0.475 | 38   | 128 | 974  | 0.064 | 4    |
| 104 | 680  | 0.057 | 5    | 129 | 977  | 0.387 | 4    |
| 105 | 681  | 0.209 | 17   | 130 | 978  | 0.066 | 4    |
| 106 | 685  | 0.326 | 26   | 131 | 981  | 0.379 | 24   |
| 107 | 686  | 0.382 | 31   | 132 | 990  | 0.081 | 5    |
| 108 | 697  | 0.455 | 37   | 133 | 994  | 0.048 | 3    |
| 109 | 809  | 0.052 | 4    | 134 | 996  | 0.284 | 18   |
| 110 | 820  | 0.095 | 8    | 135 | 997  | 0.052 | 3    |
| 111 | 821  | 0.076 | 6    | 136 | 1007 | 0.058 | 4    |
| 112 | 829  | 0.783 | 36   | 137 | 1009 | 0.058 | 4    |
| 113 | 836  | 0.755 | 34   | 138 | 1012 | 0.438 | 28   |
| 114 | 834  | 0.85  | 39   | 139 | 1013 | 0.059 | 4    |
| 115 | 918  | 0.136 | 9    | 140 | 1015 | 0.387 | 24   |
| 116 | 919  | 0.393 | 25   | 141 | 1032 | 0.093 | 6    |
| 117 | 920  | 0.369 | 23   | 142 | 1064 | 0.068 | 4    |
| 143 | 1073 | 0.055 | 3    | 167 | 729  | 0.656 | 37.8 |
| 144 | 1074 | 0.349 | 22   | 168 | 739  | 0.064 | 3.7  |
| 145 | 1342 | 0.069 | 4    | 169 | 740  | 0.308 | 17.8 |
| 146 | 1368 | 0.073 | 5    | 170 | 747  | 0.561 | 32.3 |
| 147 | 1374 | 0.056 | 4    | 171 | 754  | 0.07  | 4.0  |
| 148 | 1378 | 0.053 | 3    | 172 | 759  | 0.128 | 7.4  |
| 149 | 1379 | 0.474 | 30   | 173 | 760  | 0.651 | 37.5 |
| 150 | 1388 | 0.054 | 3    | 174 | 766  | 0.072 | 4.1  |
| 151 | 1389 | 0.312 | 20   | 175 | 767  | 0.057 | 3.3  |
| 152 | 1390 | 0.612 | 39   | 176 | 769  | 0.134 | 7.7  |
| 153 | 1452 | 0.34  | 24   | 177 | 775  | 0.571 | 32.9 |
| 154 | 1462 | 0.063 | 4    | 178 | 776  | 0.647 | 37.3 |
| 155 | 1463 | 0.344 | 24   | 179 | 778  | 0.214 | 12.3 |
| 156 | 1510 | 0.063 | 4    | 180 | 782  | 0.428 | 24.7 |
| 157 | 1512 | 0.568 | 40   | 181 | 783  | 0.076 | 4.4  |
| 158 | 1518 | 0.06  | 4    | 182 | 788  | 0.068 | 3.9  |
| 159 | 1519 | 0.611 | 6    | 183 | 790  | 0.648 | 37.3 |
| 160 | 1520 | 0.078 | 6    | 184 | 791  | 0.091 | 5.2  |
| 161 | 1522 | 0.056 | 4    | 185 | 794  | 0.06  | 3.5  |
| 162 | 1523 | 0.305 | 22   | 186 | 796  | 0.087 | 5.0  |
| 163 | 715  | 0.075 | 4.3  | 187 | 800  | 0.087 | 5.0  |
| 164 | 720  | 0.254 | 14.6 | 188 | 801  | 0.095 | 5.5  |
| 165 | 727  | 0.109 | 6.3  | 189 | 1106 | 0.174 | 10.0 |
| 166 | 728  | 0.064 | 3.7  | 190 | 1107 | 0.3   | 17.3 |
| 191 | 1154 | 0.072 | 4.1  | 214 | 543  | 0.683 | 36   |
| 192 | 1196 | 0.067 | 3.9  | 215 | 846  | 0.624 | 33   |
| 193 | 1208 | 0.215 | 12.4 | 216 | 1109 | 0.089 | 5    |
| 194 | 1232 | 0.635 | 36.6 |     |      |       |      |
| 195 | 1249 | 0.137 | 7.9  |     |      |       |      |
| 196 | 1258 | 0.061 | 3.5  |     |      |       |      |
| 197 | 1259 | 0.145 | 8.4  |     |      |       |      |
| 198 | 1260 | 0.376 | 21.7 |     |      |       |      |
| 199 | 1262 | 0.084 | 4.8  |     |      |       |      |
| 200 | 1263 | 0.069 | 4.0  |     |      |       |      |
| 201 | 1264 | 0.075 | 4.3  |     |      |       |      |
| 202 | 1265 | 0.344 | 19.8 |     |      |       |      |
| 203 | 1266 | 0.615 | 35.4 |     |      |       |      |
| 204 | 1267 | 0.064 | 3.7  |     |      |       |      |
| 205 | 1268 | 0.391 | 22.5 |     |      |       |      |
| 206 | 1237 | 0.176 | 10.1 |     |      |       |      |
| 207 | 773  | 0.42  | 37   |     |      |       |      |
| 208 | 1395 | 0.14  | 12   |     |      |       |      |

|     |     |       |    |
|-----|-----|-------|----|
| 209 | 448 | 0.106 | 6  |
| 210 | 449 | 0.09  | 5  |
| 211 | 450 | 0.137 | 7  |
| 212 | 505 | 0.749 | 40 |
| 213 | 541 | 0.742 | 40 |

No. = Serial number; Sample ID = Sample Identity; O.D reading = Optical Density reading; S/N%= Suspect or Negative Value Percentage.

**Table S2.** Optical density wavelength readings for the RVFV IgM Antibodies.

| No. | Sample ID | O.D Reading | S/N % | No. | Sample ID | O.D Reading | S/N % |
|-----|-----------|-------------|-------|-----|-----------|-------------|-------|
| 1   | 6         | 0.273       | 69    | 36  | 992       | 0.229       | 51    |
| 2   | 57        | 0.253       | 53    | 37  | 1009      | 0.229       | 51    |
| 3   | 104       | 0.295       | 62    | 38  | 1041      | 0.294       | 66    |
| 4   | 112       | 0.239       | 56    | 39  | 1075      | 0.333       | 51    |
| 5   | 150       | 0.229       | 51    | 40  | 1134      | 0.346       | 57    |
| 6   | 156       | 0.229       | 51    | 41  | 1139      | 0.319       | 53    |
| 7   | 174       | 0.231       | 52    | 42  | 1140      | 0.352       | 58    |
| 8   | 179       | 0.284       | 73    | 43  | 1141      | 0.321       | 53    |
| 9   | 189       | 0.264       | 76    | 44  | 1142      | 0.312       | 51    |
| 10  | 211       | 0.259       | 72    | 45  | 1146      | 0.335       | 55    |
| 11  | 217       | 0.299       | 76    |     |           |             |       |
| 12  | 219       | 0.262       | 73    |     |           |             |       |
| 13  | 221       | 0.268       | 76    |     |           |             |       |
| 14  | 263       | 0.295       | 82    |     |           |             |       |
| 15  | 281       | 0.297       | 87    |     |           |             |       |
| 16  | 303       | 0.224       | 66    |     |           |             |       |
| 17  | 336       | 0.231       | 81    |     |           |             |       |
| 18  | 389       | 0.287       | 54    |     |           |             |       |
| 19  | 421       | 0.224       | 77    |     |           |             |       |
| 20  | 473       | 0.283       | 78    |     |           |             |       |
| 21  | 511       | 0.334       | 91    |     |           |             |       |
| 22  | 640       | 0.301       | 59    |     |           |             |       |
| 23  | 762       | 0.274       | 58    |     |           |             |       |
| 24  | 766       | 0.247       | 52    |     |           |             |       |
| 25  | 777       | 0.388       | 87    |     |           |             |       |
| 26  | 779       | 0.373       | 67    |     |           |             |       |
| 27  | 781       | 0.337       | 76    |     |           |             |       |
| 28  | 785       | 0.334       | 70    |     |           |             |       |
| 29  | 786       | 0.373       | 78    |     |           |             |       |
| 30  | 799       | 0.344       | 54    |     |           |             |       |
| 31  | 800       | 0.238       | 50    |     |           |             |       |
| 32  | 821       | 0.253       | 53    |     |           |             |       |
| 33  | 831       | 0.295       | 62    |     |           |             |       |
| 34  | 916       | 0.284       | 73    |     |           |             |       |
| 35  | 956       | 0.231       | 52    |     |           |             |       |

No. = Serial number; Sample ID = Sample Identity; O.D reading = Optical Density reading; S/N%= Suspect or Negative Value Percentage.

**Table S3.** Distribution of serum samples across the ecological zones and antibody seropositive results at individual livestock level.

| Ecological Zones          |          | EZ 1 |     |     |     |     |     |     |     | EZ 2 |     |     |     | EZ 3 |     |     |     | Total sampled  |
|---------------------------|----------|------|-----|-----|-----|-----|-----|-----|-----|------|-----|-----|-----|------|-----|-----|-----|----------------|
| Number of Animals Sampled |          | 831  |     |     |     |     |     |     |     | 314  |     |     |     | 378  |     |     |     | 1523           |
|                           | District | SA   |     | MH  |     | CK  |     | NE  |     | TO   |     | CZ  |     | CP   |     | KA  |     |                |
| Livestock Species         | Sampled  | IgG  | IgM | IgG | IgM | IgG | IgM | IgG | IgM | IgG  | IgM | IgG | IgM | IgG  | IgM | IgG | IgM | Total reactors |
| Cattle                    | 857      | 32   | 1   | 37  | 8   | 5   | 1   | 21  | 2   | 12   | 2   | 14  | 1   | 33   | 7   | 6   | 1   | 183            |
| Goat                      | 518      | 7    | 0   | 9   | 0   | 2   | 2   | 7   | 1   | 4    | 2   | 1   | 1   | 0    | 3   | 2   | 0   | 40             |
| Sheep                     | 148      | 8    | 0   | 3   | 0   | 2   | 13  | 8   | 0   | 0    | 0   | 0   | 0   | 0    | 0   | 3   | 0   | 38             |
| Total                     | 1523     | 47   | 1   | 49  | 8   | 9   | 16  | 36  | 3   | 16   | 4   | 15  | 2   | 33   | 10  | 11  | 1   | 261            |
| EZ total reactors         |          | 169  |     |     |     |     |     |     |     | 37   |     |     |     | 55   |     |     |     |                |

IgG= Immunoglobulin G; IgM= Immunoglobulin M; EZ=Ecological zone; EZ 1= Ecological zone 1, EZ 2= Ecological zone 2, EZ 3= Ecological zone 3; District names: SA= Salima, MH=Mangochi, CK=Chikwawa, NE=Nsanje, TO= Thyolo, CZ=Chiradzulu, CP= Chitipa, and KA= Karonga.

**Table S4.** Distribution of serum samples across the ecological zones and districts and antibody seropositive results at herd level.

|                         |         | EZ 1 |     |     |     |     |     |     |     | EZ 2 |     |     |     | EZ 3 |     |     |     | Total<br>sampled  |
|-------------------------|---------|------|-----|-----|-----|-----|-----|-----|-----|------|-----|-----|-----|------|-----|-----|-----|-------------------|
| EZ herds Sampled        |         | 85   |     |     |     |     |     |     |     | 143  |     |     |     | 133  |     |     |     | 361               |
| Districts               |         | SA   |     | MH  |     | CK  |     | NE  |     | TO   |     | CZ  |     | CP   |     | KA  |     | Total<br>reactors |
| Number of sampled herds |         | 29   |     | 19  |     | 20  |     | 17  |     | 63   |     | 80  |     | 70   |     | 63  |     |                   |
|                         |         | IgG  | IgM | IgG | IgM | IgG | IgM | IgG | IgM | IgG  | IgM | IgG | IgM | IgG  | IgM | IgG | IgM |                   |
| Antibody tests          |         |      |     |     |     |     |     |     |     |      |     |     |     |      |     |     |     |                   |
| Livestock               | Sampled |      |     |     |     |     |     |     |     |      |     |     |     |      |     |     |     |                   |
| species                 |         |      |     |     |     |     |     |     |     |      |     |     |     |      |     |     |     |                   |
| Cattle                  | 224     | 6    | 1   | 6   | 4   | 2   | 1   | 5   | 2   | 8    | 2   | 10  | 1   | 21   | 6   | 5   | 1   | 81                |
| Goat                    | 123     | 3    | 0   | 4   | 0   | 1   | 2   | 3   | 0   | 3    | 2   | 1   | 1   | 0    | 3   | 2   | 0   | 25                |
| Sheep                   | 14      | 3    | 0   | 2   | 0   | 1   | 4   | 2   | 1   | 0    | 0   | 0   | 0   | 0    | 0   | 1   | 0   | 14                |
| District total          |         | 13   |     | 16  |     | 11  |     | 13  |     | 15   |     | 13  |     | 30   |     | 9   |     | 120               |
| EZ total reactors       |         | 29   |     |     |     |     |     |     |     | 52   |     |     |     | 39   |     |     |     |                   |

*n* = number; IgG= Immunoglobulin G; IgM= Immunoglobulin M; EZ=Ecological zone; EZ 1= Ecological zone 1, EZ 2= Ecological zone 2, EZ 3= Ecological zone 3; District names: SA= Salima, MH=Mangochi, CK=Chikwawa, NE=Nsanje, TO= Thyolo, CZ=Chiradzulu, CP= Chitipa, and KA= Karonga.
